# Supplementary material for: Synthesis of Au@MOF core–shell hybrids for enhanced photodynamic/photothermal therapy
Source: Royal Society of Chemistry journal article supplement (doi:10.1039/d1tb00800e), 2021-01-01
Supplement: d1tb00800e1.pdf [file d1tb00800e1.pdf]

## Supporting Information

### **Synthesis of Au@MOF Core-Shell Hybrids for Enhanced Photodynamic/Photothermal Therapy**

Xue Cai<sup>a,b,#</sup>, Yuewu Zhao<sup>b,#</sup>, Li Wang<sup>b</sup>, Mingchao Hu<sup>b</sup>, Zeen Wu<sup>a,b</sup>, Lifen Liu<sup>\*,a</sup>,  
Weipei Zhu<sup>\*,a</sup>, Renjun Pei<sup>\*,b</sup>

<sup>a</sup>Department of Obstetrics and Gynecology, the Second Affiliated Hospital of Soochow University, Suzhou, 215004, China.

<sup>b</sup>CAS Key Laboratory of Nano-Bio Interface, Suzhou Institute of Nano-Tech and Nano-Bionics, Chinese Academy of Sciences, Suzhou, 215123, China.

<sup>#</sup>These authors contribute equally.

\*E-mail: [rjpei2011@sinano.ac.cn](mailto:rjpei2011@sinano.ac.cn); Tel: +86-512-62872776.

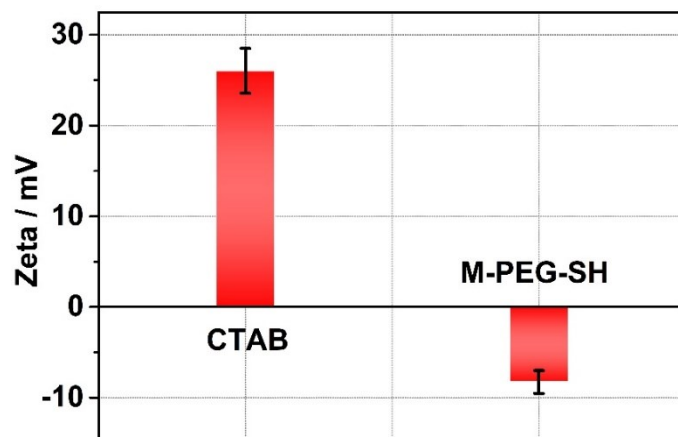

**Figure S1.** Zeta potential of AuNRs solutions with CTAB and M-PEG-SH surface ligands respectively.

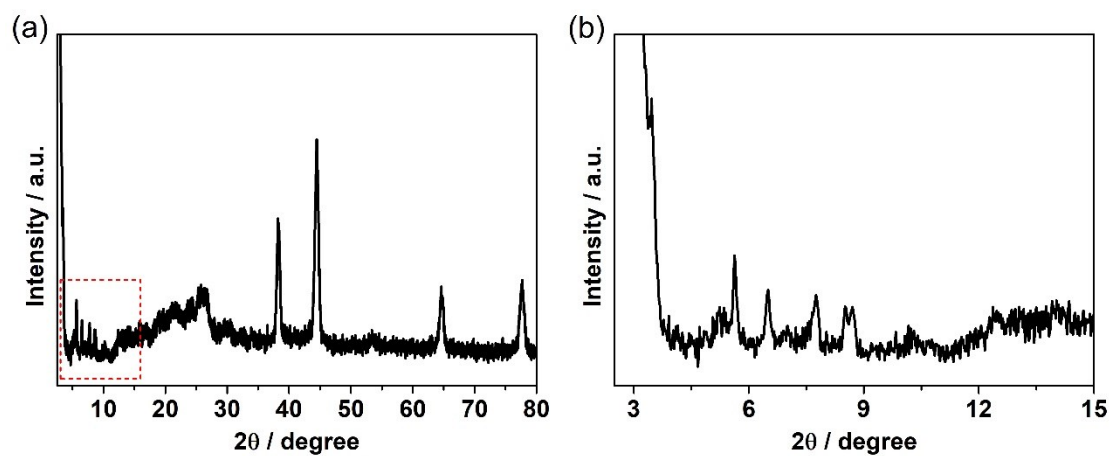

**Figure S2.** (a) Normal and (b) enlarged XRD patterns of the Au@MOF core-shell hybrids.

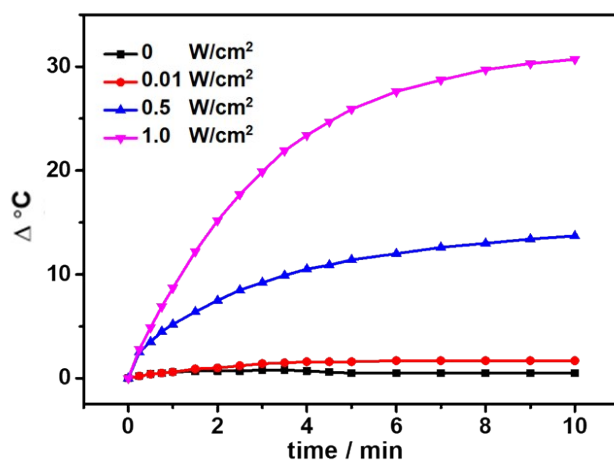

**Figure S3.** Temperature elevation curves of Au@MOF-2 (0.5 nM) with the different power (0, 0.01, 0.5, and 1.0 W/cm<sup>2</sup>) of 660 nm laser irradiation.

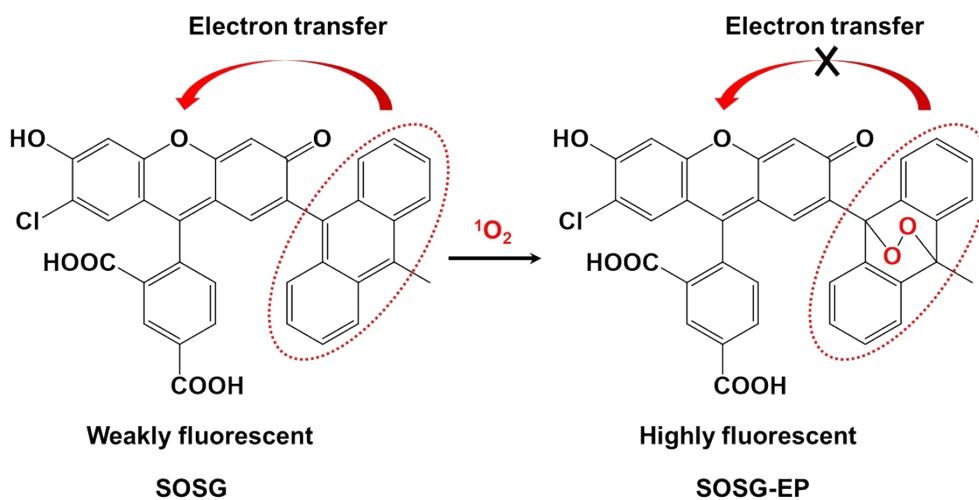

**Figure S4.** SOSG can react with <sup>1</sup>O<sub>2</sub> to produce the endoperoxide of SOSG-EP, thus enhancing fluorescence.

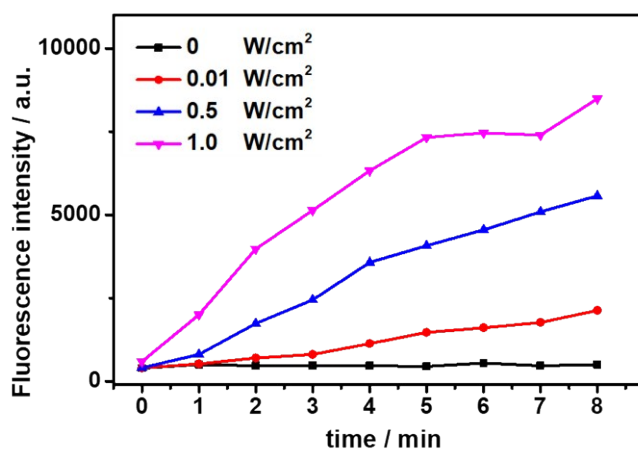

**Figure S5.** Fluorescence intensity curves of SOSG-EP treated with Au@MOF-2 nanoparticles at the different power (0, 0.01, 0.5, and 1.0 W/cm<sup>2</sup>) of 660 nm laser irradiation.

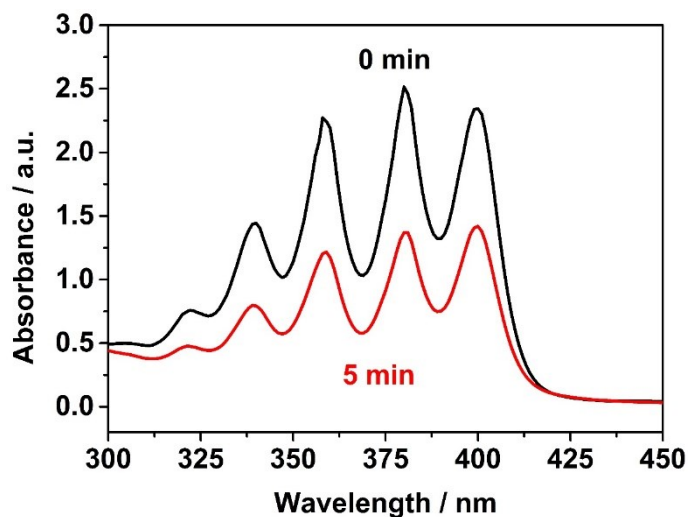

**Figure S6.** UV-vis absorption spectra of 9,10-anthracene diylbis-(methylene) dimalonic acid (ABMD, 1.0 mmol/L) treated with Au@MOF-2 (0.5 nmol/L) nanoparticles. Laser 660 nm, 0.5 W/cm<sup>2</sup>, 5min.

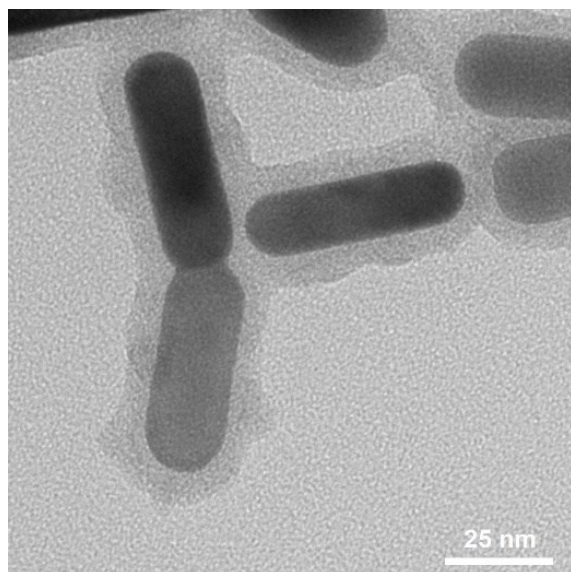

**Figure S7.** TEM image of Au@MOF-2 after 0.5 W/cm<sup>2</sup> laser power irradiation.
